# Supplementary material
Source: ML conference proceedings conference paper supplement (https://openaccess.thecvf.com/content/CVPR2024/html/Zhang_Learning_Dynamic_Tetrahedra_CVPR_2024_paper.html)
Supplement: Supplementary file 2 [file Zhang_Learning_Dynamic_Tetrahedra_CVPR_2024_supplemental.zip]

Archive with 2 entries (2 files):
- CVPR2024-12130-SM.pdf
- CVPR2024-12139-SM.mp4
